# Supplementary material
Source: Oxford University Press journal article supplement (http://www.oxfordjournals.org/our_journals/ejechocard/supplements/vol1_vii.pdf)
Supplement: Supplementary file 1 [file vol1_vii.pdf]

# Welcome Address for Euroecho 3

The Working Group on Echocardiography of the European Society of Cardiology cordially welcomes you for the third time to the largest scientific and educational event in Europe dedicated to the cardiovascular applications of ultrasound.

As in previous years, Euroecho 3 is an excellent opportunity for our members and other interested colleagues, including adult and pediatric cardiologists, surgeons, anaesthetists, sonographers, professional researchers and representatives of industry, to explore emerging issues and developments in the use of ultrasound in cardiology and to look forward towards novelties of the next millennium.

Furthermore, we celebrate this time the fact that the abstracts are published for the first time in our own European Journal of Echocardiography, this makes Euroecho 3 a very special event. This annual scientific meeting is an integral part of the activities of our Working Group which intends Scientific and Teaching activities to increase the capability of its members to deliver high quality diagnosis and treatment of patients with cardiovascular disease.

A. Distanté  
A. Fraser  
G. Maurer  
P. Nihoyannopoulos  
L. Piérard  
G. Sutherland  
C. Visser
